# Supplementary material for: Redox Metabolism Measurement in Mammalian Cells and Tissues by LC-MS
Source: Preprints.org preprint supplement (doi:10.20944/preprints202104.0390.v1), 2021-04-14
Supplement: Supplementary file 1 [file TableS1.xlsx]

## Sheet: List of standards
Metabolite name	Molecular weight	Manufacturer	Part#	Molecular weight of chemical standard	HMDB link	Polarity for detection	neg m/z	pos m/z
2-hydroxybutyric acid	104.1	Sigma	220116	126.09	http://www.hmdb.ca/metabolites/HMDB0000008	neg	103.04	105.055
2-hydroxybutyric acid	104.105	Sigma	220116	126.09	http://www.hmdb.ca/metabolites/HMDB0000008	neg	103.04	105.055
2-hydroxyglutarate	148.114	Sigma	H8378	192.1	http://www.hmdb.ca/metabolites/HMDB0059655	neg	147.03	149.044
2-oxobutyric acid	102.089	Sigma	K401	102.09	http://www.hmdb.ca/metabolites/HMDB0000005	neg	101.024	103.039
2-oxoglutarate	146.11	Sigma	75890-25G	146.11	http://www.hmdb.ca/metabolites/HMDB0062781	neg	145.014	147.029
3-hydroxybutyric acid	104.105	Sigma	H6501	126.09	http://www.hmdb.ca/metabolites/HMDB00357	neg	103.04	105.055
3-hydroxyisobutyric acid	104.105	Adipogen	CDX-H0085-M250	126.09	http://www.hmdb.ca/metabolites/HMDB0000023	neg	103.04	105.055
3-methyl-2-oxobutyrate	116.115	Sigma	198994-5G	138.1	http://www.hmdb.ca/metabolites/HMDB0000019	neg	115.04	117.055
3-methyl-2-oxopentanoic acid	130.142	Sigma	198978-5G	152.12	http://www.hmdb.ca/metabolites/HMDB0000491	neg	129.056	131.07
3-phosphoglycerate	186.06	Sigma	P8877	230.02	http://www.hmdb.ca/metabolites/HMDB0000807	neg	184.986	187
Acetylalanine	131.13	Sigma	A4625-1G	131.13	http://www.hmdb.ca/metabolites/HMDB0000766	pos	130.051	132.065
Acetylaspartate	175.139	Sigma	00920-5G	175.14	http://www.hmdb.ca/metabolites/HMDB0000812	pos	174.041	176.055
Acetylcarnitine	203.236	Sigma	A6706	239.7	http://www.hmdb.ca/metabolites/HMDB0000201	pos	202.108	204.123
Acetylglutamate	189.166	Sigma	855642	189.166	http://www.hmdb.ca/metabolites/HMDB0001138	pos	188.056	190.071
Acetylglutamine	188.183	Sigma	A9125-25G	188.18	http://www.hmdb.ca/metabolites/HMDB0006029	pos	187.072	189.087
Acetylglycine	117.103	Sigma	A16300-5G	117.103	http://www.hmdb.ca/metabolites/HMDB0000532	neg	116.035	118.05
Acetylmethionine	191.245	Sigma	01310-5G	191.245	http://www.hmdb.ca/metabolites/HMDB0011745	pos	190.054	192.069
ADP	427.203	Sigma	A5285	501.32	http://www.hmdb.ca/metabolites/HMDB0001341	pos	426.022	428.037
Alanine	89.09	Sigma	A7469	89.09	http://www.hmdb.ca/metabolites/HMDB0000161	pos	88.0404	90.055
Allantoin	158.121	Sigma	05670-25G	158.12	http://www.hmdb.ca/metabolites/HMDB0000462	neg	157.037	159.051
Aminoadipate	161.156	Sigma	A0637	161.156	http://www.hmdb.ca/metabolites/HMDB00510	both	160.061	162.076
AMP	347.221	Sigma	A1752	347.22	http://www.hmdb.ca/metabolites/HMDB0000045	neg	346.056	348.07
Arginine	174.2	Sigma	A6969	210.66	http://www.hmdb.ca/metabolites/HMDB0000517	pos	173.104	175.119
Argininosuccinate	290.273	Sigma	A5707-50MG	334.24	http://www.hmdb.ca/metabolites/HMDB0000052	neg	289.115	291.13
Ascorbate	176.124	Sigma	A7506	198.11	http://www.hmdb.ca/metabolites/HMDB0000044	neg	175.025	177.039
Asparagine	132.12	Sigma	A7094	150.13	http://www.hmdb.ca/metabolites/HMDB0000168	pos	131.046	133.061
Aspartate	133.11	Sigma	A7219	133.11	http://www.hmdb.ca/metabolites/HMDB0000191	neg	132.03	134.045
Asymmetric dimethylarginine	202.25	Cayman	80230	275.2	http://www.hmdb.ca/metabolites/HMDB0001539	pos	201.136	203.151
ATP	507.18	Sigma	A2383	551.14	http://www.hmdb.ca/metabolites/HMDB0000538	neg	505.988	508.003
beta-alanine	89.093	Sigma	14064	89.093	http://www.hmdb.ca/metabolites/HMDB0000056	pos	88.0404	90.055
Betaine	117.146	Sigma	61962	117.146	http://www.hmdb.ca/metabolites/HMDB0000043	pos	116.072	118.086
Biotin	244.31	Sigma	B4639	244.31	http://www.hmdb.ca/metabolites/HMDB0000030	pos	243.081	245.095
Carnitine	161.199	Sigma	C0283	197.66	http://www.hmdb.ca/metabolites/HMDB0000062	pos	160.098	162.113
Carnosine	226.232	Sigma	C9625-5G	226.23	http://www.hmdb.ca/metabolites/HMDB0000033	pos	225.099	227.114
CDP	403.177	Abcam	ab146214-100mg	403.2	http://www.hmdb.ca/metabolites/HMDB0001546	pos	402.011	404.026
CDP-choline	489.332	Alfa	J64161-10g	510.31	http://www.hmdb.ca/metabolites/HMDB0001413	pos	488.103	490.117
Choline	104.171	Sigma	C7017	139.62	http://www.hmdb.ca/metabolites/HMDB0000097	pos	102.092	104.107
cis-aconitic acid	174.108	Sigma	A3412-1G	174.108	http://www.hmdb.ca/metabolites/HMDB0000072	neg	173.009	175.024
Citrate	192.124	Mallinckrodt	754	294.1	http://www.hmdb.ca/metabolites/HMDB0000094	neg	191.02	193.034
Citrulline	175.2	Sigma	C7629	175.2	http://www.hmdb.ca/metabolites/HMDB0000904	pos	174.088	176.103
CMP	323.197	Sigma	C1006	367.16	http://www.hmdb.ca/metabolites/HMDB0000095	pos	322.045	324.059
Coenzyme A	767.535	Sigma	C4282	767.53	http://www.hmdb.ca/metabolites/HMDB0001423	pos	766.108	768.122
Creatine	131.133	Sigma	C0780-50G	131.133	http://www.hmdb.ca/metabolites/HMDB0000064	pos	130.062	132.077
Creatinine	113.12	Sigma	C4255-10MG	113.12	http://www.hmdb.ca/metabolites/HMDB0000562	pos	112.052	114.066
CTP	483.156	Sigma	C1506	527.12	http://www.hmdb.ca/metabolites/HMDB0000082	neg	505.9	483.992
Cystathionine	222.263	Cayman	16061-50mg	222.263	http://www.hmdb.ca/metabolites/HMDB0000099	both	221.06	223.075
Cysteic acid	169.16	Santa Cruz	sc-485621	169.16	http://www.hmdb.ca/metabolites/HMDB0002757	neg	167.997	170.012
Cysteine-glycine (dipeptide)	178.21	Sigma	C0166-100MG	178.21	http://www.hmdb.ca/metabolites/HMDB0000078	pos	177.034	179.048
Cystine	240.3	Sigma	C7602	240.3	http://www.hmdb.ca/metabolites/HMDB0000192	pos	239.017	241.031
Cytidine	243.217	Sigma	C4654	243.217	http://www.hmdb.ca/metabolites/HMDB0000089	pos	242.078	244.093
dATP	491.2	Sigma	D6500	535.15	http://www.hmdb.ca/metabolites/HMDB0001532	pos	489.994	492.008
dCTP	467.2	Sigma	D4635	511.12	http://www.hmdb.ca/metabolites/HMDB0000998	neg	465.982	467.997
Deoxycytidine	227.217	Sigma	D3897	227.217	http://www.hmdb.ca/metabolites/HMDB0000014	pos	226.083	228.098
DHAP	170.06	Sigma	51269	180.19	http://www.hmdb.ca/metabolites/HMDB0001473	neg	168.99	171.005
Dimethylglycine	103.12	Sigma	D1156-5G	103.12	http://www.hmdb.ca/metabolites/HMDB0000092	pos	102.056	104.071
DL-2-aminobutyric acid	103.12	Sigma	162663-25G	103.12	http://www.hmdb.ca/metabolites/HMDB0000452	neg	102.056	104.107
dTMP	320.193	Sigma	T7004-100MG	366.17	http://www.hmdb.ca/metabolites/HMDB0001227	neg	321.049	323.064
FAD	785.55	Sigma	F6625	829.51	http://www.hmdb.ca/metabolites/HMDB0001248	neg	784.15	786.164
Folic acid	441.397	Sigma	F8758	441.397	http://www.hmdb.ca/metabolites/HMDB0000121	pos	440.132	442.147
GTP	523.2	Sigma	G8877	523.18	http://www.hmdb.ca/metabolites/HMDB0001273	neg	521.983	523.998
Formyl-methionine	177.221	Sigma	F3377-250MG	177.22	http://www.hmdb.ca/metabolites/HMDB0001015	neg	176.039	178.053
Fructose	180.16	Sigma	F0127	180.16	http://www.hmdb.ca/metabolites/HMDB0000660	neg	179.056	181.071
Fructose-1,6-bisphosphate	340.116	Sigma	F6803	406.06	http://www.hmdb.ca/metabolites/HMDB0001058	pos	338.989	341.003
Fumarate	116.07	Sigma	240745	116.07	http://www.hmdb.ca/metabolites/HMDB0000134	neg	116.046	117.018
gamma-aminobutyric acid	103.12	Sigma	A2129-10G	103.12	http://www.hmdb.ca/metabolites/HMDB0000112	pos	102.056	104.071
gamma-glutamyl-alanine	217.222	Sigma	483834-500MG	218.21	http://www.hmdb.ca/metabolites/HMDB0029142	pos	217.082	219.098
GDP	443.201	Sigma	G7127	443.2	http://www.hmdb.ca/metabolites/HMDB0001201	pos	442.017	444.032
Glucose	180.156	Sigma	G7528	180.156	http://www.hmdb.ca/metabolites/HMDB0000122	neg	179.056	181.071
Glucose-1-phosphate	260.135	Sigma	G6750	336.32	http://www.hmdb.ca/metabolites/HMDB0001586	neg	259.022	261.037
Glucose-6-phosphate	260.135	Sigma	G7879	282.12	http://www.hmdb.ca/metabolites/HMDB0001401	neg	259.022	261.037
Glutamate	147.13	Sigma	G8415	147.13	http://www.hmdb.ca/metabolites/HMDB0000148	neg	146.046	148.06
Glutamine	146.14	Sigma	G3126	146.14	http://www.hmdb.ca/metabolites/HMDB0000641	pos	145.062	147.076
Glutathione	307.324	Sigma	G4251	307.324	http://www.hmdb.ca/metabolites/HMDB0000125	pos	306.077	308.091
Glutathione disulfide	612.631	Sigma	G4376	612.631	http://www.hmdb.ca/metabolites/HMDB0003337	pos	611.145	613.159
Glycerate	106.077	Sigma	367494	286.25	http://www.hmdb.ca/metabolites/HMDB0000139	neg	105.019	107.034
Glycerol-3-phosphate	172.074	Cayman	20729-100mg	370.4	http://www.hmdb.ca/metabolites/HMDB0000126	pos	171.006	173.021
Glycerophosphocholine	258.231	Sigma	G5291-50MG	257.22	http://www.hmdb.ca/metabolites/HMDB0000086	pos	256.096	258.11
Glycine	75.066	Sigma	G7126	75.066	http://www.hmdb.ca/metabolites/HMDB0000123	pos	74.0248	76.0393
GMP	363.22	Sigma	G8377	407.18	http://www.hmdb.ca/metabolites/HMDB0001397	neg	362.051	364.065
Guanidinoacetate	117.107	Sigma	G11608	117.107	http://www.hmdb.ca/metabolites/HMDB0000128	pos	116.047	118.061
Histidine	155.155	Sigma	53319	155.155	http://www.hmdb.ca/metabolites/HMDB0000177	pos	154.062	156.077
Homocitrulline	189.212	Santa Cruz	sc-269298-100mg	189.21	http://www.hmdb.ca/metabolites/HMDB0000679	pos	188.104	190.119
Homocysteine	135.185	TCI	H0159	135.185	http://www.hmdb.ca/metabolites/HMDB0000742	pos	134.028	136.043
Hydroxyproline	131.13	Sigma	H54409	131.13	http://www.hmdb.ca/metabolites/HMDB0000725	pos	130.051	132.065
Hypotaurine	109.147	Sigma	H1384-100MG	109.147	http://www.hmdb.ca/metabolites/HMDB0000965	pos	108.013	110.027
Hypoxanthine	136.112	Sigma	H9377	136.112	http://www.hmdb.ca/metabolites/HMDB0000157	pos	135.031	137.046
IMP	348.206	Sigma	57510-5G	392.17	http://www.hmdb.ca/metabolites/HMDB0000175	pos	347.04	349.054
Indolelactate	205.21	Sigma	I5508-250MG-A	205.21	http://www.hmdb.ca/metabolites/HMDB0000671	pos	204.067	206.081
Inosine	268.229	Sigma	I4125	268.229	http://www.hmdb.ca/metabolites/HMDB0000195	both	267.074	269.088
Isoleucine	131.173	Sigma	I7403	131.173	http://www.hmdb.ca/metabolites/HMDB0000172	pos	130.087	132.102
Itaconic acid	130.099	Sigma	I29204	130.099	http://www.hmdb.ca/metabolites/HMDB0002092	neg	129.019	131.034
Kynurenine	208.214	Sigma	K8625	208.21	http://www.hmdb.ca/metabolites/HMDB0000684	pos	207.077	209.092
L-2-aminobutyric acid	103.12	Sigma	A2536-1G	103.12	http://www.hmdb.ca/metabolites/HMDB0000452	pos	102.055	104.071
Lactate	90.09	Sigma	L7022	112.06	http://www.hmdb.ca/metabolites/HMDB0000190	neg	89.0244	91.039
Leucine	131.17	Sigma	L8912	131.173	http://www.hmdb.ca/metabolites/HMDB0000687	pos	130.087	132.102
L-Ureidosuccinic acid	176.128	Alfa	A17166-10g	176.128	http://www.hmdb.ca/metabolites/HMDB0000828	neg	175.036	177.051
Lysine	146.19	Sigma	L8662	182.65	http://www.hmdb.ca/metabolites/HMDB0000182	pos	145.098	147.113
Malate	134.087	Sigma	2288	134.087	http://www.hmdb.ca/metabolites/HMDB0000744	neg	133.014	135.029
Mannose	180.16	Sigma	M6020-25G	180.16	http://www.hmdb.ca/metabolites/HMDB0000169	neg	179.056	181.071
Methionine	149.21	Sigma	M5308	149.21	http://www.hmdb.ca/metabolites/HMDB0000696	pos	148.044	150.058
Methionine sulfoxide	165.21	Sigma	M1126-1G	165.21	http://www.hmdb.ca/metabolites/HMDB0002005	pos	164.039	166.053
Methylthioadenosine	297.334	Sigma	D5011-25MG	297.334	http://www.hmdb.ca/metabolites/HMDB0001173	neg	296.082	298.096
myo-Inositol	180.16	Sigma	I5125	180.16	http://www.hmdb.ca/metabolites/HMDB0000211	neg	179.056	181.071
N6-acetyllysine	188.224	Sigma	A4021-1G	188.22	http://www.hmdb.ca/metabolites/HMDB0000206	pos	187.109	189.123
NAD+	663.43	Sigma	N1511	663.43	http://www.hmdb.ca/metabolites/HMDB0000902	pos	662.102	664.116
NADP+	744.413	Sigma	N0505	765.39	http://www.hmdb.ca/metabolites/HMDB0000217	both	742.068	744.083
Niacinamide	122.12	Sigma	72340	122.12	http://www.hmdb.ca/metabolites/HMDB0001406	pos	121.041	123.055
O-phosphoethanolamine	141.063	Sigma	P0503-1G	141.063	http://www.hmdb.ca/metabolites/HMDB0000224	neg	140.012	142.026
Ornithine	132.16	Sigma	75469	168.62	http://www.hmdb.ca/metabolites/HMDB0000214	pos	131.083	133.097
Orotate	156.1	Sigma	O2875	194.19	http://www.hmdb.ca/metabolites/HMDB0000226	neg	155.01	157.024
p-aminobenzoate	137.138	Sigma	A9878	137.138	http://www.hmdb.ca/metabolites/HMDB0001392	nes	136.04	138.055
Pantothenate	219.23	Sigma	P5155	238.27	http://www.hmdb.ca/metabolites/HMDB0000210	both	218.103	220.118
Phenylacetylglutamine	264.3	Cayman	16724-25mg	264.3	http://www.hmdb.ca/metabolites/HMDB0006344	pos	263.104	265.118
Phenylalanine	165.19	Sigma	P5482	165.19	http://www.hmdb.ca/metabolites/HMDB0000159	pos	164.072	166.086
Phosphocholine	184.152	Sigma	P0378-5G	329.73	http://www.hmdb.ca/metabolites/HMDB0001565	pos	182.059	184.073
Phosphocreatine	211.114	Sigma	P7936-1G	255.08	http://www.hmdb.ca/metabolites/HMDB0001511	pos	210.029	212.043
Phosphoenolpyruvate	168.042	Sigma	P3637	267.22	http://www.hmdb.ca/metabolites/HMDB0000263	neg	166.975	168.99
Phosphoserine	185.07	Fluka	79710	185.07	http://www.hmdb.ca/metabolites/HMDB0000272	pos	184.002	186.016
Picolinate	123.109	Sigma	P42800-5G	123.11	http://www.hmdb.ca/metabolites/HMDB0002243	pos	122.024	124.039
Pipecolate	129.157	Sigma	P45850-25G	129.16	http://www.hmdb.ca/metabolites/HMDB0000070	pos	128.072	130.086
Proline	115.13	Sigma	P5607	115.13	http://www.hmdb.ca/metabolites/HMDB0000162	pos	114.056	116.071
Pyridoxal	167.16	Sigma	P9130-500MG	203.62	http://www.hmdb.ca/metabolites/HMDB0001545	pos	166.051	168.065
Pyridoxine	169.18	Sigma	P9755	205.64	http://www.hmdb.ca/metabolites/HMDB0000239	pos	168.066	170.081
Pyruvate	88.06	Sigma	P5280	110.04	http://www.hmdb.ca/metabolites/HMDB0000243	both	87.0084	89.0233
Riboflavin	376.369	Sigma	R9504	376.369	http://www.hmdb.ca/metabolites/HMDB0000244	pos	375.131	377.146
Ribose-5-phosphate	230.11	Sigma	83875	310.1	http://www.hmdb.ca/metabolites/HMDB0001548	neg	229.012	231.026
SAH	384.4	Sigma	A9384-25MG	384.41	http://www.hmdb.ca/metabolites/HMDB0000939	pos	383.114	385.129
Sarcosine	89.0932	Sigma	131776-100G	89.09	http://www.hmdb.ca/metabolites/HMDB0000271	pos	88.0404	90.055
Serine	105.09	Sigma	S4311	105.09	http://www.hmdb.ca/metabolites/HMDB0000187	neg	104.035	106.05
Sorbitol	182.17	Sigma	W302902	182.17	http://www.hmdb.ca/metabolites/HMDB0000247	neg	181.072	183.086
Succinate	118.09	Sigma	S3674	118.09	http://www.hmdb.ca/metabolites/HMDB0000254	neg	117.019	119.034
Taurine	125.15	Sigma	T0625	125.15	http://www.hmdb.ca/metabolites/HMDB0000251	neg	124.007	126.022
Thiamine	265.35	Sigma	T4625	337.23	http://www.hmdb.ca/metabolites/HMDB0000235	neg	263.097	265.112
Threonine	119.119	Sigma	T8441	119.119	http://www.hmdb.ca/metabolites/HMDB0000167	pos	118.051	120.066
Thymidine	242.229	Sigma	T9250	242.229	http://www.hmdb.ca/metabolites/HMDB0000273	neg	241.083	243.097
trans-Urocanate	137.118	Cayman	16228	137.118	http://www.hmdb.ca/metabolites/HMDB0062562	pos	137.036	139.05
Trimethyllysine	189.279	Sigma	T1660-25MG	224.73	http://www.hmdb.ca/metabolites/HMDB0001325	neg	229.012	231.026
Tryptophan	204.225	Sigma	T8941	204.225	http://www.hmdb.ca/metabolites/HMDB0000929	pos	203.083	205.097
Tyrosine	181.19	Sigma	T8566	181.19	http://www.hmdb.ca/metabolites/HMDB0000158	pos	180.067	182.081
UDP	404.161	Sigma	94330-100MG	448.12	http://www.hmdb.ca/metabolites/HMDB0000295	pos	402.995	405.01
UDP-GlcNAc	607.354	Sigma	U4375	651.32	http://www.hmdb.ca/metabolites/HMDB0000290	both	606.074	608.089
UDP-glucose	566.302	Sigma	U4625-100MG	610.27	http://www.hmdb.ca/metabolites/HMDB00286	neg	565.048	567.062
UMP	324.181	Sigma	U6375-1G	368.15	http://www.hmdb.ca/metabolites/HMDB0000288	pos	323.029	325.043
Uracil	112.087	Sigma	U0750	112.087	http://www.hmdb.ca/metabolites/HMDB0000300	neg	111.02	113.035
Uric acid	168.11	Sigma	U2625-25G	168.11	http://www.hmdb.ca/metabolites/HMDB0000289	neg	167.021	169.036
Uridine	244.201	Sigma	U3003	244.201	http://www.hmdb.ca/metabolites/HMDB0000296	neg	243.062	245.077
UTP	484.141	Sigma	U6625	559.09	http://www.hmdb.ca/metabolites/HMDB0000285	neg	482.961	484.975
Valine	117.151	Sigma	V0513	117.151	http://www.hmdb.ca/metabolites/HMDB0000883	pos	116.072	118.086
Xanthine	152.11	Sigma	X7375-10G	152.11	http://www.hmdb.ca/metabolites/HMDB0000292	neg	151.026	153.041
dihydrofolate	443.4	Schircks	16.206-50	443.4	https://hmdb.ca/metabolites/HMDB0001056		442.148	444.163
biliverdin	582.6	FrontierScience	B655-9	619.12	https://hmdb.ca/metabolites/HMDB0001008	pos	581.241	583.255
Coproporphyrin III	654.7	FrontierScience	C654-3	727.64	https://hmdb.ca/metabolites/HMDB0000570	pos	653.262	655.276
Deuteroporphyrin IX	510.6	FrontierScience	D510-9	583.51	https://hmdb.ca/metabolites/HMDB0000579	pos	509.219	511.234
porphobilinogen	226.23	FrontierScience	P226	244.24	https://hmdb.ca/metabolites/HMDB0000245	pos	225.088	227.103
Protoporphyrin IX	562.7	FrontierScience	P562-9	562.66	https://hmdb.ca/metabolites/HMDB0000241	pos	561.251	563.265
5-aminolevulinic acid	131.13	FrontierScience	A167	167.59	https://hmdb.ca/metabolites/HMDB0001149	pos	130.051	132.065
Glutathione	307.32	Sigma	G4251-1G	307.32	https://hmdb.ca/metabolites/HMDB0000125	pos	306.077	308.091
Glutathione disulfide	612.63	Sigma	G4376-200MG	612.63	https://hmdb.ca/metabolites/HMDB0003337	pos	611.145	613.159
Ellman's reagent	396.35	Sigma	D8130	396.35
NAD+	663.43	BioVision	2734-500	663.43	https://hmdb.ca/metabolites/HMDB0000902	pos	662.102	664.116
NADH	665.4	BioVision	2735-500	709.4	https://hmdb.ca/metabolites/HMDB0001487	pos	664.117	666.132
NADP+	744.4	Sigma	481971-100mg	765.39	https://hmdb.ca/metabolites/HMDB0000217	pos	742.068	744.083
NADPH	745.4	BioVision	2738-50	833.35	https://hmdb.ca/metabolites/HMDB0000221	pos	744.084	746.098

## Sheet: RTs of standards
Metabolite name	Standardized name	Formula	Exact mass	neg m/z	pos m/z	preferred polarity	Retention time (min.) ZIC-pHILIC	Retention time (min.) Accucore HILIC	Retention time (min.) LUNA-NH2	Notes HILIC	HILIC MS2	Notes Accucore	Accucore MS2	Notes LUNA	LUNA MS2
2-hydroxybutyric acid	2-Hydroxybutyric acid	C4H8O3	104.047	103.04	105.055	neg	4.10	2.27	7.7	multiple peaks, confirmed with standards	confirmed	spread peak	confirmed
2-hydroxyglutarate	2-Hydroxyglutaric acid	C5H8O5	148.037	147.03	149.044	neg	10.19	7.88	11.59	two peaks, slightly different distribution of MS2 products	confirmed	Cannot resolve L- from R-2HG on HILIC	confirmed
2-oxobutyric acid	3-Methyl pyruvic acid	C4H6O3	102.032	101.024	103.039	neg	3.31	3.93	na		no	multiple peaks , best MS2 match peak at 3:93	confirmed, only standard	double peak, spreak out and unclear
2-oxoglutarate	Oxoglutaric acid	C5H6O5	146.022	145.014	147.029	neg	10.92	10.57	11.91		not seen		not seen
3-hydroxybutyric acid	3-Hydroxybutyric acid	C4H8O3	104.047	103.04	105.055	neg	4.99	2.27	8.37	different RT than 2-HBA	confirmed	can't tell from 2-HB based on MS2	confirmed
3-hydroxyisobutyric acid	3-Hydroxyisobutyric acid	C4H8O3	104.047	103.04	105.055	neg	5.49	na	8.91	smaller and later of two peaks, second peak 3-hydrohybutyric acid	confirmed, MS2 same as 2 or 3-HBA	large peak aroun 3min not correct	not seen
3-methyl-2-oxobutyrate	Ketoisovaleric acid	C5H8O3	116.047	115.04	117.055	neg	3.17	2.29	5.95		confirmed		no sufficient informative product ions	somewhat spread peak
3-methyl-2-oxopentanoic acid	3-methyl-2-oxopentanoic acid	C6H10O3	130.063	129.056	131.07	neg	2.66	0.6	5.86			weak signal	partial
3-phosphoglycerate	3-Phosphoglyceric acid	C3H7O7P	185.993	184.986	187	neg	11.3	9.8	13.76	a bit spread out	confirned	very spread peak	confirmed
Acetylalanine	N-Acetylalanine	C5H9NO3	131.058	130.051	132.065	pos	4.68	9.9	8.4		confirmed		confirmed
Acetylaspartate	N-Acetylaspartic acid	C6H9NO5	175.048	174.041	176.055	neg	10.3	10.46	11.42		not seen		not seen
Acetylcarnitine	CAR 2:0	C9H17NO4	203.116	202.108	204.123	pos	5.56	9.24	5.86				confirmed
Acetylglutamate	N-Acetyl-mannosamine	C8H15NO6	221.09	188.056	190.071	pos	9.94	5.7	11.42		not seen	only peak 5:70 correct	confirmed
Acetylglutamine	N-Acetylglutamic acid	C7H11NO5	189.064	187.072	189.087	pos	6.29	3.83	9.6	first of two weak peaks, could be shifting with column run time	confirmed	spread peak	confirmed
Acetylglycine	N-Acetylglycine	C4H7NO3	117.043	116.035	118.05	neg	5.76	6.11	5.85		confirmed		unclear, precursor is intact	not seen
Acetylmethionine	N-Acetylmethionine	C7H13NO3S	191.062	190.054	192.069	pos	3.33	2.25	3	yes	not suffiecient signal	only peak at 2:25	confirmed, only with standard
ADP	ADP	C10H15N5O10P2	427.029	426.022	428.037	pos	9.94	9.6	14.48		confirmed	multiple peaks at m/z, only 9:60 correct	confirmed
Alanine	Alanine	C3H7NO2	89.0477	88.0404	90.055	pos	8.85	10.4	8.1		confirmed	smaller of two peaks	confirmed
Allantoin	Allantoin	C4H6N4O3	158.044	157.037	159.051	neg	8.26	4.22	6.43		confirmed	weak peak and coeluting interfering m/z	confirmed
Aminoadipate	Aminoadipic acid	C6H11NO4	161.069	160.061	162.076	pos	10.4	8.46	11.06		not seen	peak at 8:40 and not larger peak at 11:30 is correct	confirmed
AMP	AMP	C10H14N5O7P	347.063	346.056	348.07	neg	9.61	9.05	12.51				not seen
Arginine	Arginine	C6H14N4O2	174.112	173.104	175.119	pos	14.23	19.39	10.33	spread out peak	confirmed	often at end of gradient	not seen	somewhat spread peak
Argininosuccinate	Argininosuccinic acid	C10H18N4O6	290.123	289.115	291.13	neg	11.62	10.75	10.96				not seen
Ascorbate	Vitamin C	C6H8O6	176.032	175.025	177.039	neg	9.82	5	10.36			possible low detecion, wrong precursor triggered	not seen
Asparagine	Asparagine	C4H8N2O3	132.054	131.046	133.061	pos	9.31	8.94	9.29		confirmed		confirmed
Aspartate	Aspartic acid	C4H7NO4	133.037	132.03	134.045	neg	9.64	8.22	10.58		confirmed	spread peak	confirmed
Asymmetric dimethylarginine	Dimethylarginine	C8H18N4O2	202.143	201.136	203.151	pos	11.74	12.07	8.96		confirmed	only peak at 12:07	confirmed, only with standard
ATP	ATP	C10H16N5O13P3	506.996	505.988	508.003	neg	10.83	9.96	15.75		confirmed		confirmed, only with standard
beta-alanine	beta-Alanine	C3H7NO2	89.0477	88.0404	90.055	pos	9.44	10.35	8.93	MS2 match to alanine as well, so can only tell apart by RT	confirmed		confirmed
Betaine	Betaine	C5H11NO2	117.079	116.072	118.086	pos	6.22	7.92	5.69	running before valine	confirmed		not seen
Biotin	Biotin	C10H16N2O3S	244.088	243.081	245.095	pos	4.43	2.63	6		confirmed		confirmed, with standard only
Carnitine	Carnitine	C7H15NO3	161.105	160.098	162.113	pos	7.72	11.26	7.42		confirmed		confirmed
Carnosine	Carnosine	C9H14N4O3	226.107	225.099	227.114	pos	9.47	11.19	10.21		confirmed		confirmed
CDP	CDP	C9H15N3O11P2	403.018	402.011	404.026	pos	11.40	12.51	14.2		confirmed		not seen
CDP-choline	Cytidine 5'-diphosphocholine	C14H26N4O11P2	488.107	488.103	490.117	pos	10.05	11	10.75		confirmed	only peak at 11 triggered, peak at 9 unknown	confirmed
Choline	Choline	C5H14NO	104.108	102.092	104.107	pos	9.03	8.5	8.83		confirmed	runs as double peak , both ok. But not later (10:90 peak)	confirmed	large, spread peak
cis-aconitic acid	cis-Aconitic acid	C6H6O6	174.016	173.009	175.024	neg	11.13	7.66	11.5	multiple peaks and peak shifts with column age	confirmed	hyperspread potentially due to interfering mass: standard has low but good signal	confirmed, only with standard
Citrate	Citric acid	C6H8O7	192.027	191.02	193.034	neg	12.23	9.7	13.42	peak a bit spread out, shifts with column age	confirmed	spread peak	confirmed
Citrulline	Citrulline	C6H13N3O3	175.096	174.088	176.103	pos	9.74	9.88	8.9	three additional peaks all with different MS2s	confirmed		confirmed
CMP	CMP	C9H14N3O8P	323.052	322.045	324.059	pos	10.62	9.85	12.33	smaller peak at 8:50 not match	confirmed	runs as triple peak	confirmed
Coenzyme A	Coenzyme A	C21H36N7O16P3S	767.115	766.108	768.122	neg	8.91	10.85	9.2		weak but likely		not seen	not seen
Creatine	Creatine	C4H9N3O2	131.07	130.062	132.077	pos	8.78	9.15	7.37		confirmed		confirmed
Creatinine	Creatinine	C4H7N3O	113.059	112.052	114.066	pos	4.51	4.16	4		confirmed		confirmed
CTP	CTP	C9H16N3O14P3	482.985	505.9	483.992	neg	12.3	10.82	15.64		not seen	peak at 10;82 has four matching masses, peak at 12 unclear	confirmed, only with standard
Cystathionine	Cystathionine	C7H14N2O4S	222.067	221.06	223.075	pos	11.2	11.08	11.07		not seen		confirmed
Cysteic acid	Cysteic acid	C3H7NO5S	169.005	167.997	170.012	neg	10.54	5.6	11.74		confirmed		confirmed
Cysteine-glycine (dipeptide)	-	C5H10N2O3S	178.041	177.034	179.048	pos	6.56	4	9.4	RT by standard only	no info in DBs		no info in DBs
Cystine	Cystine	C6H12N2O4S2	240.024	239.017	241.031	pos	10.41	9.6	11.23	has two extra peaks with different MS2s	confirmed		confirmed
Cytidine	Cytidine	C9H13N3O5	243.085	242.078	244.093	pos	6.40	5.3	6		confirmed	peak at 5:30 correct ms2	confirmed
dATP	dATP	C10H16N5O12P3	491.001	489.994	492.008	pos	10.27	na	15.75		confirmed		not seen
dCTP	dCTP	C9H16N3O13P3	466.99	465.982	467.997	neg	11.46	na	15.44		confirmed		not seen
Deoxycytidine	Deoxycytidine	C9H13N3O4	227.091	226.083	228.098	pos	5.15	3.45	5.37	only Metlin data, partial match	partially, low signal		partial, no mzCloud data, Melin partial
DHAP	Dihydroxyacetone phosphate	C3H7O6P	169.998	168.99	171.005	neg	10.18	9.44	10.44	two peaks with same MS2, second peak is at 12.14, unclear	two peaks with same MS2, second peak is at 12.14, unclear		not seen	not seen
Dimethylglycine	Dimethylglycine	C4H9NO2	103.063	102.056	104.071	pos	6.77	8.56	7.45	RT confrimed iht standard, but cant discriminate from gamma-aminobutyric acid on MS2 only	confirmed	only peak at 8:56 and not peak at 10:90	confirmed	can't tell apart from 2-aminobutyric acid
DL-2-aminobutyric acid	2-Aminobutyric acid	C4H9NO2	103.063	102.056	104.107	both	7.93	8.42	7.45	RT from standard, other peaks present. Also confirmed at pos mode. Peak at 10:59 not matching MS2	confirmed	three peaks, all MS2 confirmed, main peak at 8:42	confirmed, only positive	can't tell apart from dimethylglycine
dTMP	dTMP	C10H15N2O8P	322.057	321.049	323.064	neg	8.50	8.41	12.08		confirmed		not seen
FAD	FAD	C27H33N9O15P2	785.157	784.15	786.164	neg	7.19	6.7	7.51		confirmed	peak a bit spread	confirmed, only on standard	not seen
Folic acid	Folic acid	C19H19N7O6	441.14	440.132	442.147	pos	11.42	7.07	14.44		confirmed		confirmed, only with standard
Formyl-methionine	N-Formylmethionine	C6H11NO3S	177.046	176.039	178.053	neg	3.21	2.25	7.4		confirmed		confirmed, only standard
Fructose	Fructose	C6H12O6	180.063	179.056	181.071	neg	7.88	na	5.76	MS2 overlap with other sugars	confirmed	low signal , no confirming MS2 products present	not seen
Fructose-1,6-bisphosphate	Fructose 1,6-bisphosphate	C6H14O12P2	339.996	338.989	341.003	pos	12.16	10.86	15.33		no sufficient DB info, but QQQ MS2 comparison likely match		not seen
Fumarate	Fumaric acid	C4H4O4	116.011	116.046	117.018	pos	NC	7.92	11.63	shifts with column age, no MS2 triggered on standard	not seen		not seen
gamma-aminobutyric acid	gamma-Aminobutyric acid	C4H9NO2	103.063	102.056	104.071	pos	9.43	10.87	9.01	MS2 identical to 2-(dimethylamino)acetic acid , correct peak is at 9:43	confirmed	only peak at 10.87 correct	confirmed
gamma-glutamyl-alanine	Gamma-Glutamylalanine	C8H14N2O5	218.09	217.082	219.098	pos	9.50	7.97	10.8	MS2 match in metlin only	confirmed	nice peak at 7:96 but no info in DB	no info in DBs
GDP	GDP	C10H15N5O11P2	443.024	442.017	444.032	pos	12.5	12.65	15.26		not seen	Very small linear range of detection	not seen
Glucose	Glucose	C6H12O6	180.063	179.056	181.071	neg	9.33	7.5	6.46	cant tell from apart from fructose/mannose on MS2	confirmed	only peak at 7.46	confirmed
Glucose-1-phosphate	Glucose 1-phosphate	C6H13O9P	260.03	259.022	261.037	neg	10.60	10.31	12.39	only peak at 10:60, overlap in RT with F1P, first of two peaks, RT based on standard, MS2 confirmed but overlapping with other P-sugars	confirmed	(on HILIC This is not distinguishable by m/z or retention time from Fructose-6-phosphate); clear m/z but low dignal	confirmed
Glucose-6-phosphate	Glucose 6-phosphate	C6H13O9P	260.03	259.022	261.037	neg	11.30	10.75	12.15	beware of RT as multiple other isobar sugars elute near	confirmed	hyperspread	parcial	not seen
Glutamate	Glutamic acid	C5H9NO4	147.053	146.046	148.06	neg	9.69	7.85	10.8		confirmed		confirmed
Glutamine	Glutamine	C5H10N2O3	146.069	145.062	147.076	pos	9.13	9.12	8.92		confirmed		confirmed
Glycerate	Glyceric acid	C3H6O4	106.027	105.019	107.034	neg	7.49	3.7	9.84	only see peak at 7.49 in standard, peak at 8:80 only in samples (has similar MS2)	confirmed	spread peak	confirmed	somewhat spread peak
Glycerol-3-phosphate	sn-Glycero-3-phosphate	C3H9O6P	172.014	171.006	173.021	pos	9.87	9.03	12.25		too few informative product ions	likely peak at 8:80 rathern than 9:40	too few informative product ions
Glycerophosphocholine	sn-Glycero-3-phosphocholine	C8H20NO6P	257.103	256.096	258.11	pos	8.71	11.98	8.05		confirmed		confirmed
Glycine	Glycine	C2H5NO2	75.032	74.0248	76.0393	pos	9.65	9.53	8.92		confirmed		not seen
GMP	GMP	C10H14N5O8P	363.058	362.051	364.065	neg	11.23	10.03	13.46		confirmed		confirmed
GTP	GTP	C10H16N5O14P3	522.991	521.983	523.998	neg	12.91	11.04	16.73		confirmed	11.04 has some corresponding products but cant tell if really GTP	insufficient
Guanidinoacetate	Guanidoacetic acid	C3H7N3O2	117.054	116.047	118.061	pos	9.68	9.3	8.1	one main ion is missing but match is good	confirmed	only peak at 9:29 correct	confirmed
Histidine	Histidine	C6H9N3O2	155.07	154.062	156.077	pos	9.31	12	9.47	hyper spread out peak	confirmed	spread out	confirmed
Homocitrulline	Homocitrulline	C7H15N3O3	189.111	188.104	190.119	pos	9.62	9.55	8.4			only peak at 9:55 (two extra peak present)	confirmed
Homocysteine	Homocysteine	C4H9NO2S	135.035	134.028	136.043	pos	7.47	6.15	7.65	runs as double peak with standard, both peaks same MS2	confirmed	multiple peaks , peak at 5:88 most complete MS2 match	multiple peaks
Hydroxyproline	Hydroxyproline	C5H9NO3	131.058	130.051	132.065	pos	8.79	9.27	8.16	cannot separate from gamma-ALA	confirmed		confirmed
Hypotaurine	Hypotaurine	C2H7NO2S	109.02	108.013	110.027	pos	9.13	9.15	8.94		confirmed		confirmed
Hypoxanthine	Hypoxanthine	C5H4N4O	136.038	135.031	137.046	pos	5.20	3.72	8	a second small peak is present, same MS2 pattern, unclear if different compound	confirmed	runs as double peak	confirmed
IMP	IMP	C10H13N4O8P	348.047	347.04	349.054	pos	10.39	9.24	13.54		confirmed	runs as double peak , only later peak triggered MS2	confirmed
Indolelactate	Indolelactic acid	C11H11NO3	205.074	204.067	206.081	pos	3.86	2.07	8.3		confirmed		confirmed, only standard
Inosine	Inosine	C10H12N4O5	268.081	267.074	269.088	pos	5.98	4.3	8.69		confirmed		confirmed
Isoleucine	Isoleucine	C6H13NO2	131.095	130.087	132.102	pos	6.08	5.72	6.66		confirmed		confirmed
Itaconic acid	Itaconic acid	C5H6O4	130.027	129.019	131.034	neg	10.06	6.38	11.6		confirmed	two separate peaks , both share MS2 products	unclear, two peaks
Kynurenine	Kynurenine	C10H12N2O3	208.085	207.077	209.092	pos	5.56	4.06	7.17		confiremed		confirmed, only with standard
L-Ureidosuccinic acid	Carbamoylaspartate	C5H8N2O5	176.043	175.036	177.051	neg	11.28	11.17	11.76		confirmed		not seen
Lactate	Lactic acid	C3H6O3	90.0317	89.0244	91.039	neg	5.41	2.82	6.46	only peak at 5:42 correct with standards run	confirmed	spread peak	confirmed
Leucine	Leucine	C6H13NO2	131.095	130.087	132.102	pos	5.68	5.22	6.4		confirmed		confirmed
Lysine	Lysine	C6H14N2O2	146.106	145.098	147.113	pos	13.62	16.07	11.53	early peak present but different MS2	confirmed		not seen	somewhat spread peak
Malate	Malic acid	C4H6O5	134.022	133.014	135.029	neg	10.74	6.6	11.56	RT moves with column age	confirmed	multiple peaks at m/z, peak at 6:60 correct	confirmed
Mannose	Mannose	C6H12O6	180.063	179.056	181.071	neg	8.35	7.61	6.34		confirmed at 8:35	only peak at 7:60	confirmed
Methionine	Methionine	C5H11NO2S	149.051	148.044	150.058	pos	6.22	5.44	7.28		confirmed		confirmed
Methionine sulfoxide	Methionine sulfoxide	C5H11NO3S	165.046	164.039	166.053	pos	7.94	8.44	9.29		confirmed	multiple peaks, only 8:44 peak had correct MS2	confirmed
Methylthioadenosine	5'-Methylthioadenosine	C11H15N5O3S	297.09	296.082	298.096	neg	2.76	2.47	3.33		confirmed		confirmed, only with standard	somewhat spread peak
myo-Inositol	Myo-inositol	C6H12O6	180.063	179.056	181.071	neg	10.79	7.5	na	strong peak at 10:79 with standard, however MS2 match to fructose and other sugars as well	confirmed	multiple peaks and interfering m/z	partial	not seen
N-acetyllysine	N(2)-Acetyllysine	C8H16N2O3	188.116	187.109	189.123	pos	7.72	8.5	7.58			only peak at 8:52 (three more peaks present )	confirmed
Niacinamide	Niacinamide	C6H6N2O	122.048	121.041	123.055	pos	3.06	2.63	2.31		confirmed		confirmed
phosphoethanolamine	Phosphoethanolamine	C2H8NO4P	141.019	140.012	142.026	neg	11.11	12.45	11.27		confirmed		confirmed
Ornithine	Ornithine	C5H12N2O2	132.09	131.083	133.097	pos	12.50	20	10.98		confirmed		confirmed
Orotate	Orotic acid	C5H4N2O4	156.017	155.01	157.024	neg	6.07	2.48	10.04		confirmed		confirmed, only on standard	spread peak
p-aminobenzoate	P-Aminobenzoic acid	C7H7NO2	137.048	136.04	138.055	neg	6.2	na	10.59		confirmed	hyperspread	confirmed	spread peak
Pantothenate	Pantothenic acid	C9H17NO5	219.111	218.103	220.118	pos	5.30	2.8	9.2		confirmed		confirmed
Phenylacetylglutamine	alpha-N-Phenylacetylglutamine	C13H16N2O4	264.111	263.104	265.118	pos	3.37	2.44	7.9		not seen		confirmed
Phenylalanine	Phenylalanine	C9H11NO2	165.079	164.072	166.086	pos	4.78	4.05	7.05		confirmed		confirmed
Phosphocholine	Choline phosphate	C5H14NO4P	183.066	182.059	184.073	pos	10.17	14.66	10.95		confirmed		confirmed
Phosphocreatine	Phosphocreatine	C4H10N3O5P	211.036	210.029	212.043	pos	10.14	9.5	11.38		not clear		not seen	not seen
Phosphoenolpyruvate	Phosphoenolpyruvic acid	C3H5O6P	167.982	166.975	168.99	neg	11.84	9.27	14.4	RT moves with column age	confirmed	peak is a bit zigzaggy	confirmed
Phosphoserine	Phosphoserine	C3H8NO6P	185.009	184.002	186.016	pos	11.47	10.1	12.55		no match		confirmed, in positive
Picolinate	Picolinic acid	C6H5NO2	123.032	122.024	124.039	pos	4.37	2.08	4.46		confirmed		confirmed, only standard
Pipecolate	Pipecolic acid	C6H11NO2	129.079	128.072	130.086	pos	6.8	8.33	7.1		confirmed	only 8:25 peak correct (small peak between one small and one large later peak)	confirmed
Proline	Proline	C5H9NO2	115.063	114.056	116.071	pos	7.22	9.04	7.67	confrimed by only two prodcut ions	confirmed		confirmed
Pyridoxal	Pyridoxal	C8H9NO3	167.058	166.051	168.065	pos	3.76	3.39	6.38		confirmed		not seen
Pyridoxine	Pyridoxine	C8H11NO3	169.074	168.066	170.081	pos	3.63	3.28	6.09		confirmed		confirmed	somewhat spread peak
Pyruvate	Pyruvic acid	C3H4O3	88.016	87.0084	89.0233	neg	4.32	2.34	na	tends to move with column ag	weak single MS2 product	hyperspread	na	not seen
Riboflavin	FMN	C17H21N4O9P	456.105	375.131	377.146	pos	3.48	3.41	na		confirmed	peak a bit spread	confirmed, standard only	not seen
Ribose-5-phosphate	Ribose 5-phosphate	C5H11O8P	230.019	229.012	231.026	neg	10.56	9.3	11.94	two peaks, only 9:30 correct, however trimethyllysine co-elutes	confirmed	somewhat spread peak	confirmed
SAH	S-Adenosylhomocysteine	C14H20N6O5S	384.122	383.114	385.129	pos	7.80	8.3	10.04		confirmed		confirmed
Sarcosine	Sarcosine	C3H7NO2	89.0477	88.0404	90.055	pos	8.67	9.36	8.48	m/z as alanine/lactamide, RT different, MS2 non match	unclear	peaks at 10:30 and 9:30 have common MS2 producs	confirmed, only standard
Serine	Serine	C3H7NO3	105.043	104.035	106.05	pos	9.59	9.36	9.36		confirmed		confirmed
Sorbitol	Sorbitol	C6H14O6	182.079	181.072	183.086	neg	8.20	na	6.14		confirmed		not seen
Succinate	Succinic acid	C4H6O4	118.027	117.019	119.034	neg	10.17	6	11.62	MS2 of methylmalonic acid identical; RT moves with column age	confirmed, but just two product ions	only peak at 6 correct	confirmed
Taurine	Taurine	C2H7NO3S	125.015	124.007	126.022	pos	9.58	6.15	8.17		confirmed		confirmed
Thiamine	Thiamine	C12H17N4OS	265.112	263.097	265.112	neg	6.79	5.52	6.34		not seen		not seen	a bit spread out peak
Threonine	Threonine	C4H9NO3	119.058	118.051	120.066	pos	8.65	8.36	8.69		confirmed	larger and later of a double peak	confirmed
Thymidine	Thymidine	C10H14N2O5	242.09	241.083	243.097	neg	3.06	2.76	3.16		not seen	multiple peaks , 2:76 has good MS2 match	confirmed, only with standard
trans-Urocanate	Urocanic acid	C6H6N2O2	138.043	137.036	139.05	pos	6.52	3.13	10.94	two extra peaks: 4:25 and 5:25	confirmed		confirmed
Trimethyllysine	N-6-Trimethyllysine	C9H20N2O2	188.153	229.012	231.026	neg	10.54	na	11.77		confirmed but one ion product only		not seen, even with standard	unclear, possibly spreak peak or overlapping with R5P
Tryptophan	Tryptophan	C11H12N2O2	204.09	203.083	205.097	pos	6.25	4.08	7.61		confirned		confirmed
Tyrosine	Tyrosine	C9H11NO3	181.074	180.067	182.081	pos	6.16	5.85	8.71		confirmed		confirmed
UDP	UDP	C9H14N2O12P2	404.002	402.995	405.01	neg	11.04	10.24	11.99		confirmed	three peaks, most substantial MS2 match at 10:26	confirmed, only with standard
UDP-GlcNAc	UDP-GlcNAc	C17H27N3O17P2	607.082	606.074	608.089	neg	10.17	7.65	12.19		confirmed		confirmed
UDP-glucose	UDP-glucose	C15H24N2O17P2	566.055	565.048	567.062	neg	12.63	8.35	11.86		confirmed		confirmed
UMP	UMP	C9H13N2O9P	324.036	323.029	325.043	pos	10.16	9.08	12.41		not seen		confirmed
Uracil	Uracil	C4H4N2O2	112.027	111.02	113.035	neg	4.1	3.67	3.66	just a single peak at 3:90, no MS2 products generated and precursor is very stable	unclear	unclear if peak at 3.20 or 3:70	unclear
Uric acid	Uric acid	C5H4N4O3	168.028	167.021	169.036	neg	7.91	3.85	11.08		confirmed		confirmed
Uridine	Uridine	C9H12N2O6	244.07	243.062	245.077	neg	4.81	5.38	5.13		confirned	peak at 5:40 good MS2 match	confirmed
UTP	UTP	C9H15N2O15P3	483.969	482.961	484.975	neg	12.17	10.88	15.65		confirned		not seen
Valine	Valine	C5H11NO2	117.079	116.072	118.086	pos	7.29	7	7.15	smaller of two peaks	confirmed	unrelated stronger later peak	confirmed	smaller and later of two peaks
Xanthine	Xanthine	C5H4N4O2	152.033	151.026	153.041	neg	7.67	3.55	10.95		confirmed		confirmed
acetoacetate	Acetoacetic acid	C4H6O3	102.032	101.024	103.039	neg	4.23		4.23		confirmed	no info in DBs, try positive
dihydrofolate	Dihydrofolic acid	C19H21N7O6	443.155	442.148	444.163	pos	11.14				confirmed
folic acid	Folic acid	C19H19N7O6	441.14	440.132	442.147	pos	11.36				confirmed
fumarate	Fumaric acid	C4H4O4	116.011	115.004	117.018	neg	7.92	6.03	11.23		confirmed	no clear peak, possible super spread, ms2 has single product, hard to confirm (but present)	not seen seen
Sedoheptulose-7-phosphate	Sedoheptulose 7-phosphate	C7H15O10P	290.04	289.033	291.048	neg	11.04		11.74		confiremed		not seen seen
Metabolite name				neg m/z	pos m/z		Retention time (min.) ZIC-pHILIC	Retention time (min.) Accucore HILIC	Retention time (min.) LUNA-NH2	Notes HILIC	HILIC MS2	Notes Accucore	Accucore MS2	Notes LUNA	LUNA MS2
biliverdin	Biliverdin	C33H34N4O6	582.248	581.241	583.255	pos			11.69						confirmed
Coproporphyrin III	Coproporphyrin III	C36H38N4O8	654.269	653.262	655.276	pos			19.2						confirmed
Deuteroporphyrin IX	Deuteroporphyrin IX	C30H30N4O4	510.227	509.219	511.234	pos			15.8						confirmed
porphobilinogen	Porphobilinogen	C10H14N2O4	226.095	225.088	227.103	pos			11.2						confirmed
Protoporphyrin IX	Protoporphyrin	C34H34N4O4	562.258	561.251	563.265	pos			16.8						confirmed
5-aminolevulinic acid	5-Amino-levulinic acid	C5H9NO3	131.058	130.051	132.065	pos			10.12					clearly separated from hydroxyproline	confirmed
Glutathione	Glutathione	C10H17N3O6S	307.084	306.077	308.091	pos	9.52	12.80	11.13		confirmed	a bit spread out peak	confirmed		confirmed
Glutathione disulfide	Oxidized glutathione	C20H32N6O12S2	612.152	611.145	613.159	pos	11.82	15.02	12.6		confirned		confirned		confirned
GSH-Ellman's	-			503.055	505.07	neg	9.82	12.07	12.02		not present in DBs		not present in DBs	low limit of detection	not present in DBs
NAD+	NAD+	C21H28N7O14P2	664.117	662.102	664.116	pos	9.26	13.69	10.97		confirmed		confirmed		confirmed
NADH	NADH	C21H29N7O14P2	665.125	664.117	666.132	pos	8.72	12.22	11.85		confirmed		confirmed		confirmed
NADP+	NADP+	C21H29N7O17P3	744.083	742.068	744.083	pos	11.20	14.95	13.41		confirmed		confirmed		confirmed
NADPH	NADPH	C21H30N7O17P3	745.091	744.084	746.098	pos	11.40	14.15	14.9		confirmed		confirmed		confirmed
Metabolite name				neg m/z	pos m/z		Retention time (min.) ZIC-pHILIC	Retention time (min.) Accucore HILIC	Retention time (min.) LUNA-NH2	Notes HILIC	HILIC MS2	Notes Accucore	Accucore MS2	Notes LUNA	LUNA MS2
alanine-13C3-15N				92.0475	94.0621	pos	8.85	10.4	8.1
arginine-13C6,15N4				183.113	185.127	pos	14.23	19.39	10.33
aspartate-13C6-15N4				137.041	139.055	neg	9.64	8.22	10.58
cysteine_13C3_15N1				124.02	126.034	pos	4.8					not seen
cystine-13C6,15N2				247.031	249.045	pos	10.40		11.23
glutamate-13C5,15N				152.06	154.074	neg	9.69	7.85	10.8
glycine_13C2-15N				77.0284	79.043	pos	9.53		8.82			not seen
GSH_13C2-15N-Ellmans				506.058	508.073	neg	10	10	12
GSH-13C2_15N				309.08	311.095	pos	9.64	7.69	11.13
histidine-13C6-15N3				163.073	165.088	pos	9.31	12	9.47	super spread peak
Isoleucine-13C6-15N				137.105	139.119	pos	6.08	5.72	6.66
leucine-13C6-15N				137.105	139.119	pos	5.68	5.22	6.4
lysine-13C6-15N2				153.112	155.127	pos	13.62	16.07	11.53
methionine-13C5-15N				154.058	156.073	pos	6.22	5.44	7.28
phenylalanine-13C9-15N				174.099	176.113	pos	4.78	4.05	7.05
proline-13C5-15N				120.07	122.084	pos	7.22	9.04	7.67
serine-13C3-15N				108.042	110.057	pos	9.59	9.36	9.36
threonine-13C4-15N				123.061	125.076	pos	8.65	8.36	8.69
tyrosine-13C9-15N				190.094	192.108	pos	6.16	5.85	8.71
valine-13C5-15N				122.086	124.1	pos	7.29	7	7.15

## Sheet: RTs endogenous metabolites
Metabolite name	Standardized name	Formula	Exact mass	neg m/z	pos m/z	preferred polarity	Retention time (min.) ZIC-pHILIC	Retention time (min.) Accucore HILIC	HILIC MS2 and notes	Accucore MS2 and notes
1-methylnicotinamide	1-Methyl nicotinamide	C7H9N2O	137.071	135.056	137.071	pos	12.12	4	confirmed, multiple peaks, only peak at 12min match	two shouldered peak from 3:50 to 5:50, both same MS2 products
2,3-Bisphosphoglycerate	2,3-Diphosphoglyceric acid	C3H8O10P2	265.959	264.952	266.967	neg	12.7	11.42	super spread out peak
2-oxoadipate	Oxoadipic acid	C6H8O5	160.037	159.03	161.044	neg	9.8			no match
3-methyl-2-oxobutyrate	Ketoisovaleric acid	C5H8O3	116.047	115.04	117.055	neg	2.29
3-ureidopropionate	Ureidopropionic acid	C4H8N2O3	132.054	131.046	133.061	pos	7.85	9.18	too weak	trailing peak , only tail at 9:18 correct (8:84 triggers different MS2 product pattern)
5-Hydroxyindole-3-Acetate	5-Hydroxyindoleacetic acid	C10H9NO3	191.058	190.051	192.065	pos	8.5
6-phosphogluconate	6-Phosphogluconic acid	C6H13O10P	276.025	275.017	277.032		12.58	10.03		noisy and spread peak
Acetyl CoA	Acetyl-CoA	C23H38N7O17P3S	809.126	808.118	810.133	pos	8.17	6.77	confirmed	ms2 confirmed
acetylaspartate	N-Acetylaspartic acid	C6H9NO5	175.048	174.04	176.055	pos	9.90	5.95		ms2 confirmed
acetylserine	O-Acetylserine	C5H9NO4	147.053	146.046	148.06	neg	6.56	5.41		a lot of interference from unknown precursor, only one product match at 5:41, spread peak
adenine	Adenine	C5H5N5	135.054	134.047	136.062	pos	4.51	3.46	too weak	peak at 3.46 and smaller peak at 8:41 both match MS2
adenosine	Adenosine	C10H13N5O4	267.097	266.089	268.104	pos	4.1	3.46		few confimring producs on MS2, spread peak
ADP-ribose	ADP-ribose	C15H23N5O14P2	559.072	558.064	560.079	neg	10.07	7.24
AICAR	AICA ribonucleotide	C9H15N4O8P	338.063	337.055	339.07	neg	10.35	9.07		two correct MS2 products at 9:07, but low singal
Alpha-Lipoic Acid	Lipoic acid	C8H14O2S2	206.043	205.036	207.051	neg	2.80			running very early, ms2 not triggered
AMP	AMP	C10H14N5O7P	347.063	346.056	348.07	neg	9.30	8.43
anserine	Anserine	C10H16N4O3	240.122	239.115	241.13	pos	8.61	11.7		larger peak at 13:05 not matching MS2
Butyrylcarnitine	CAR 4:0	C11H21NO4	231.147	230.14	232.154	pos	3.54	9.70	good overlap with other carnitines and with mono/butyrylcarnitine	partial match, not sufficient info in DBs; spread out peak , also potential breakdown as shared MS2 products between peak at 6:40 and much samller peak at 9:70
C5 Carnitines	CAR 4:0;3Me	C12H23NO4	245.163	244.155	246.17	pos	3.26	5.27	goo spectra but no DB information	no data in DB but has matching carnitine product at 85.02841; isovaleryl- and methylbutyryl-carnitine detected together
cAMP	3',5' cyclic AMP	C10H12N5O6P	329.053	328.045	330.06	pos	5.24	2.78		tailing peak
Carbamoyl Aspartate	Carbamoylaspartate	C5H8N2O5	176.043	175.036	177.051	neg	11.27
CDP	CDP	C9H15N3O11P2	403.018	188.102	190.117	pos	11.86		confirmed
Coenzyme A	Coenzyme A	C21H36N7O16P3S	767.115	766.108	768.122	pos	8.81		confirmed
cysteine	Cysteine	C3H7NO2S	121.02	120.013	122.027	neg	4.8		not seen
cytosine	Cytosine	C4H5N3O	111.043	110.036	112.05	pos	5.88	5.18
dATP	dATP	C10H16N5O12P3	491.001	489.994	492.008	pos	10.21		confrimed
dihydroorotate	4,5-Dihydroorotic acid	C5H6N2O4	158.033	157.025	159.04	pos	7.33	5.93		noisy MS2 but 3 confirming ions present
dihydroxyacetone phosphate	Dihydroxyacetone phosphate	C3H7O6P	169.998	168.991	171.005	neg	10.44	8.67	confirmed
dTTP	dTTP	C10H17N2O14P3	481.989	480.982	482.997	neg	11.40
dUMP	dUMP	C9H13N2O8P	308.041	307.034	309.048	neg	9.64			no match on triggered precursor
erythrose 4-phosphate	Erythrose 4-phosphate	C4H9O7P	200.009	199.001	201.016	neg	11.35
Glucose-6-phosphate	Glucose 6-phosphate	C6H13O9P	260.03	259.022	261.037	neg	10.60		confrimed, overlapping peaks	sugar peaks are super spread out and non differentiated, cannot distinguish from with fructose-6-phosphate
gamma-glutamyl-alanine	Gamma-Glutamylalanine	C8H14N2O5	218.09	217.083	219.098	pos	9.53	3.25		two further prominet peaks match MS2 to a lesser extent (second peak at 5:16 includes ms2 products but has additional product at 110)
GAR	Glycineamide ribonucleotide	C7H15N2O8P	286.057	285.049	287.064	neg	11.21
GDP	GDP	C10H15N5O11P2	443.024	442.017	444.032	neg	12.40
glyceraldehyde 3-phosphate	Glyceraldehyde 3-phosphate	C3H7O6P	169.998	145.062	147.076	pos	11.35			not sufficient data in DB and interfering ion present on MS2
GTP	GTP	C10H16N5O14P3	522.991	521.983	523.998	neg	12.93	11.03	confirmed, tailing peak and might move with column age	two matching MS2 products but quite on the small size
guanidinoacetate	Guanidoacetic acid	C3H7N3O2	117.054	116.047	118.061	pos	9.60	9.3	confirmed
guanosine	Guanosine	C10H13N5O5	283.092	282.084	284.099	pos	7.23	5.31		somewhat spread peak
Itaconic Acid	Itaconic acid	C5H6O4	130.027	129.019	131.034	neg	6.38	5.5		several merged isobaric peaks, matching MS2 fragments only at 5:50 peak
Kynurenic Acid	Kynurenic acid	C10H7NO3	189.043	188.035	190.05	pos	3.20			not confirmed, not sufficient precursor at main peak or not triggered at correct RT
Methionine sulfoxide	Methionine sulfoxide	C5H11NO3S	165.046	164.038	166.053	pos	7.89	8.33	confirmed
N-acetylcysteine	N-Acetylcysteine	C5H9NO3S	163.03	162.023	164.038	neg	4.3
N-acetylornithine	N-Acetylornithine	C7H14N2O3	174.1	173.093	175.108	pos	9.72	8.72
N-acetylphenylalanine	N-Acetylphenylalanine	C11H13NO3	207.089	206.082	208.097	pos	2.34
Nicotinic Acid	Nicotinic acid	C6H5NO2	123.032	122.025	124.039	pos	4.00
palmitate	Palmitic acid	C16H32O2	256.24	255.233	257.248	neg	2.05
phosphocreatine	Phosphocreatine	C4H10N3O5P	211.036	210.029	212.043	pos	9.85	8.87		not sure, no good MS2 in DB to compare
PRPP	Phosphoribosyl pyrophosphate	C5H13O14P3	389.952	388.945	390.959	neg	13.21		super spread out peak
pseudouridine	Pseudouridine	C9H12N2O6	244.07	243.062	245.077	neg	6.91
Pyridoxal	Pyridoxal	C8H9NO3	167.058	166.051	168.065	pos	3.76	3.09	confirmed
Ribose 1-phosphate	Ribose 1-phosphate	C5H11O8P	230.019	229.012	231.026	neg	10.37			tailing peak
saccharopine	Saccharopine	C11H20N2O6	276.132	275.125	277.139	pos	10.54	9.78
S-Adenosyl-L-methionine	S-Adenosylmethionine	C15H23N6O5S	399.145	383.114	385.129	pos	9.94	8.19		unclear
S-methylcysteine	Methylcysteine	C4H9NO2S	135.035	134.028	136.043	pos	6.69
UTP	UTP	C9H15N2O15P3	483.969	482.961	484.976	neg	12.13		confrimed
xanthosine	Xanthosine	C10H12N4O6	284.076	283.068	285.083	neg	7.80
argininosuccinate	Argininosuccinic acid	C10H18N4O6	290.123	289.115	291.13	pos	11.47	10.49	confirmed	ms2 confirmed
betaine	Betaine	C5H11NO2	117.079	116.072	118.086	pos	5.92	7.96	confirmed	only 7:96 peak correct MS2
guanine	Guanine	C5H5N5O	151.049	150.042	152.057	pos	6.90	5.27	confirmed	peak at 5:27 good match, but also some match for peak at 13:03. peak at 5:27 has a shoulder with unrelated compound coeluting
propionylcarnitine	CAR 3:0	C10H19NO4	217.131	216.124	218.139	pos	4.74	7.83	confirmed	ms2 confirmed
