# Supplementary material for: Redox Metabolism Measurement in Mammalian Cells and Tissues by LC-MS
Source: Preprints.org preprint supplement (doi:10.20944/preprints202104.0390.v1), 2021-04-14
Supplement: Supplementary file 3 [file TableS3.xlsx]

## Sheet: 3 buffers RAW data
File Name	Ribose_Ribulose 5-phosphate	erythrose_4-phosphate	GSH	UMP	glycine_13C2-15N	C5 Carnitines	ADP	pyruvate	citrulline	3-methyl-2-oxobutyrate	homocysteine	formyl_methionine	guanidinoacetate	cysteine-glycine	acetylaspartate	homocitrulline	Methionine sulfoxide	niacinamide	2,3-BPG	GSH_Ellmans	5-Hydroxyindole-3-Acetate	acetylalanine	asparagine	Acetyl CoA	cytidine	cytosine	S-Adenosyl-L-Homocysteine	succinate	CDP	adenosine	uric acid	fumarate	betaine	UTP	acetylglutamate	biotin	GDP	phosphocreatine	trans-urocanic acid	dihydroorotate	6-phosphogluconate	methylthioadenosine	thymidine	GSSG	valine	Riboflavin	cAMP	phosphoenolpyruvate	Coenzyme A
20200715_QEF1_HILIC_mouse_liver_AW111	346394	1268380	775647959	49554308	N/F	31752615	15616724	1295062	17578285	N/F	N/F	527549	6292970	N/F	794937	2439577	1500617	523290830	N/F	N/F	N/F	N/F	5258809	6070167	935479	N/F	89329546	34316727	38698	131495081	126988644	5420293	3165699315	142255	8760550	N/F	610745	2277613	N/F	N/F	496074	1153739	N/F	191361998	39245620	N/F	303858	167983	4934439
20200715_QEF1_HILIC_mouse_liver_AW112	838476	2239290	2097147379	98656432	N/F	44805351	39064128	1387806	31746299	N/F	N/F	1314307	7498177	N/F	1308494	4298638	986090	1313293333	N/F	N/F	N/F	N/F	10397571	14478798	3048230	N/F	130164190	110481062	41117	39630959	210659362	13873640	6263764464	N/F	17744849	12386	1804998	3822084	N/F	N/F	1170018	1736606	N/F	216264630	91605024	N/F	635077	691172	16725180
20200715_QEF1_HILIC_mouse_liver_AW113	365179	885706	1588186854	48385800	N/F	21785754	22324278	2105948	20838242	N/F	N/F	448221	5365061	N/F	331388	2874059	1004638	695585063	N/F	N/F	N/F	N/F	4108991	8515191	796166	N/F	61679792	46897733	61145	57703224	98704490	9884187	3616009381	110549	17072069	N/F	625875	2097407	4576106	N/F	498084	617257	N/F	80264986	15443540	N/F	312321	167470	8721191
20200715_QEF1_HILIC_mouse_liver_AW114	165477	596934	1016180492	49078364	N/F	16313394	18954072	2059434	18227460	N/F	N/F	402628	2850621	N/F	591545	2345699	408145	741416383	N/F	N/F	N/F	N/F	4226367	5484283	1494450	N/F	40697769	35219923	N/F	34841483	66428811	13348858	2567461562	N/F	12772872	11389	364040	1449256	N/F	N/F	544261	947418	N/F	78812539	39753303	N/F	167633	182480	6638921
20200715_QEF1_HILIC_mouse_liver_AW115	558925	1592923	2242854131	64497492	N/F	66724521	18941598	1262315	29304319	N/F	N/F	1211285	9835950	N/F	1156182	3534025	850474	1555955203	N/F	N/F	N/F	N/F	9116093	11751365	1663381	N/F	153610834	48950156	89597	67089784	153986582	15001829	5366467830	888025	13007884	111388	785205	3091612	6451639	N/F	993160	732077	N/F	194265763	40912696	N/F	523828	401527	20292186
20200715_QEF1_HILIC_mouse_liver_AW116	862519	1649914	2106936553	97988607	N/F	62239966	29775836	1482563	41124246	N/F	N/F	1298912	8312174	N/F	1351533	4441644	884106	2238957056	N/F	N/F	N/F	N/F	11854844	18536259	4135161	N/F	162639390	113233694	22522	8566223	179442669	20556855	7273095003	N/F	20319814	255153	493876	2832166	5219644	N/F	1477110	2279150	N/F	314637282	97431778	N/F	865104	890233	20655304
20200715_QEF1_HILIC_mouse_liver_AW117	575253	1416862	2217259909	81308077	N/F	35808152	32385972	1116069	37062157	N/F	N/F	952060	10755275	N/F	706448	4545879	1421281	2148131858	N/F	N/F	N/F	N/F	7805908	15117586	1978774	N/F	122111150	91914177	74702	1957589	123181708	16173097	6722464472	380723	29585966	N/F	1235800	3432639	4262334	N/F	1225744	1292546	N/F	305821265	41788981	N/F	921272	675946	17287091
20200715_QEF1_HILIC_mouse_liver_AW118	548840	1156629	2311917269	100401366	N/F	22538368	23779393	1609868	35892543	N/F	N/F	1143628	7583401	N/F	1195960	5216035	1064232	2867840941	N/F	N/F	N/F	N/F	11366745	10908870	3308365	N/F	107263491	83565225	N/F	1405698	115248218	30318751	6306248633	N/F	31142395	148526	301301	2041830	4607766	N/F	1740632	2670328	N/F	322484513	108999851	N/F	810057	1366125	24749971
20200715_QEF1_HILIC_mouse_liver_AW119	116837	281143	153738	20486863	N/F	11879244	7080507	N/F	12159191	N/F	N/F	N/F	2983453	N/F	418127	935208	340548	574426005	N/F	38712941	N/F	N/F	3859207	4070885	571046	N/F	39187056	10855202	N/F	43014301	42845341	8641184	1393671847	N/F	4566885	N/F	265358	670067	2911161	N/F	265208	178322	N/F	19315435	18413542	N/F	113062	97052	N/F
20200715_QEF1_HILIC_mouse_liver_AW120	468918	1270475	384979	69300998	N/F	22998317	24853556	N/F	33204360	N/F	N/F	554651	5358374	N/F	1010127	2429146	647613	1268296798	N/F	148674621	N/F	N/F	8653758	13003350	2411039	N/F	95725949	70354416	N/F	136246653	119213162	14217901	4574736129	N/F	13875604	195317	485868	1883305	9533738	N/F	1053168	1218048	N/F	19896388	71495593	N/F	504126	335317	N/F
20200715_QEF1_HILIC_mouse_liver_AW121	2160255	2541781	769510	125979214	N/F	51243855	53940564	1561369	48645635	N/F	N/F	914054	15035588	N/F	778349	6983376	2292139	2013571140	N/F	349251390	N/F	N/F	12432987	28100801	3206933	N/F	236491153	145982339	89068	291536796	191840423	15450252	9543411255	N/F	40753433	49896	1296821	6975399	2980439	N/F	1812087	1988172	N/F	45936164	83764762	N/F	1298345	1057637	N/F
20200715_QEF1_HILIC_mouse_liver_AW122	622232	1065518	600039	100933301	N/F	36007814	30824105	N/F	42286688	N/F	N/F	823851	7825889	N/F	1148821	6319640	940393	2673742315	N/F	197644331	N/F	N/F	13476282	14918396	4826122	N/F	129675801	99254319	28236	229662971	128401928	21023908	6870949083	N/F	37550153	240828	571908	3181091	4486886	N/F	1453671	2939386	N/F	159460139	143605276	N/F	925928	870619	N/F
20200715_QEF1_HILIC_mouse_liver_AW127_pool1x_a	661556	1182954	636053	68979911	N/F	29686720	23528666	1084873	27913382	N/F	N/F	N/F	6337730	N/F	761507	2883639	933122	2070879009	N/F	107642681	N/F	N/F	7727346	10562542	2465925	N/F	102815463	68262347	N/F	176691613	107748295	10872260	4317441587	N/F	17333316	47511	604604	2606970	4929141	N/F	808835	1538811	N/F	166004013	61648472	N/F	834119	283321	N/F
20200715_QEF1_HILIC_mouse_liver_AW127_pool1x_b	708946	1402421	888287	78240974	N/F	35948006	26160686	2012499	33939380	N/F	N/F	648804	8084956	N/F	790407	3816502	927791	1577670788	N/F	127544884	N/F	N/F	8312827	11695349	2450099	N/F	110147171	78758765	56080	95137791	119254129	15826364	5646496882	N/F	19365433	161675	749613	2878396	4670876	N/F	1008471	1502395	N/F	187711018	86926174	N/F	648463	567320	N/F
20200715_QEF1_HILIC_mouse_liver_AW127_pool1x_c	600278	1314843	1091495	74560750	N/F	34189930	25882590	2663671	32566002	N/F	N/F	603138	7573875	N/F	843739	3708548	1063546	1571687187	N/F	121508873	N/F	N/F	9067053	12800132	2242968	N/F	122826147	74206086	N/F	68041165	128189705	15809051	5251817481	N/F	20973863	116678	822073	2800383	4531772	N/F	1168068	1767973	N/F	173491907	71865603	N/F	612055	557931	N/F
20200715_QEF1_HILIC_mouse_liver_AW128_pool03x	182730	442224	315459	26883149	N/F	12201864	9085889	919474	12143810	N/F	N/F	204091	2571333	N/F	257038	1192568	228042	546871732	N/F	30464277	N/F	N/F	3527228	3941579	630562	N/F	29887967	23867700	N/F	44301487	56759535	5134976	1818707371	N/F	8003472	N/F	154749	796322	1837352	N/F	284750	619887	N/F	51854577	20849388	N/F	120594	57482	N/F
20200715_QEF1_HILIC_mouse_liver_AW129_pool01x	47743	192659	N/F	10825821	N/F	4690358	3605216	N/F	3424454	N/F	N/F	N/F	858295	N/F	38887	331465	N/F	228046988	N/F	7178485	N/F	N/F	1072768	1491848	163633	N/F	11875306	7202977	N/F	24290086	24768628	1839880	687685105	N/F	3006628	N/F	53510	233211	518284	N/F	81082	415170	N/F	20909826	8371205	N/F	N/F	N/F	N/F
20200715_QEF1_HILIC_mouse_liver_AW129_pool01x_a	92938	170064	N/F	13765999	N/F	6104971	4322848	N/F	5627794	N/F	N/F	N/F	1265792	N/F	166658	714961	86184	379008130	N/F	11303195	N/F	N/F	1580012	2119983	307499	N/F	16033488	11847190	N/F	37786566	31950525	2156818	1050541721	N/F	4840739	N/F	72594	468895	1504323	N/F	56945	240695	N/F	21995968	17271269	N/F	84351	N/F	N/F
20200715_QEF1_HILIC_mouse_liver_blank_end1	N/F	N/F	N/F	N/F	N/F	N/F	N/F	N/F	N/F	N/F	N/F	N/F	N/F	N/F	N/F	N/F	N/F	N/F	N/F	N/F	N/F	N/F	N/F	N/F	N/F	N/F	N/F	N/F	N/F	N/F	N/F	N/F	N/F	N/F	N/F	N/F	N/F	N/F	N/F	N/F	N/F	N/F	N/F	N/F	N/F	N/F	N/F	N/F	N/F
20200715_QEF1_HILIC_mouse_liver_blank_end2	N/F	N/F	N/F	N/F	N/F	N/F	N/F	N/F	N/F	N/F	N/F	N/F	N/F	N/F	N/F	N/F	N/F	N/F	N/F	N/F	N/F	N/F	N/F	N/F	N/F	N/F	N/F	N/F	N/F	N/F	N/F	N/F	N/F	N/F	N/F	N/F	N/F	N/F	N/F	N/F	N/F	N/F	N/F	N/F	N/F	N/F	N/F	N/F	N/F
20200715_QEF1_HILIC_mouse_liver_blank1	N/F	N/F	N/F	N/F	N/F	N/F	N/F	N/F	N/F	N/F	N/F	N/F	N/F	N/F	N/F	N/F	N/F	N/F	N/F	N/F	N/F	N/F	N/F	N/F	N/F	N/F	N/F	N/F	N/F	N/F	N/F	N/F	N/F	N/F	N/F	N/F	N/F	N/F	N/F	N/F	N/F	N/F	N/F	N/F	N/F	N/F	N/F	N/F	N/F
[truncated: 164 more columns]

## Sheet: normalized and combined data
File name	Group	Ribose_Ribulose 5-phosphate	erythrose_4-phosphate	GSH	UMP	C5 Carnitines	ADP	pyruvate	citrulline	guanidinoacetate	acetylaspartate	homocitrulline	Methionine sulfoxide	niacinamide	GSH_Ellmans	asparagine	Acetyl CoA	cytidine	S-Adenosyl-L-Homocysteine	succinate	adenosine	uric acid	fumarate	betaine	acetylglutamate	GDP	phosphocreatine	6-phosphogluconate	methylthioadenosine	GSSG	valine	cAMP	dihydroxyacetone_phosphate	phenylalanine	N-acetylmethionine	2-aminobutyric_acid	Glycerophosphocholine	UDP-GlcNAc	choline	creatinine	NADPH	ornithine	guanosine	threonine	Glycerol 3-Phosphate	Ribose 1-phosphate	glutamine	acetylmethionine	UDP-hexose
20200715_QEF1_HILIC_mouse_liver_AW111	B	0.941118	1.15696	0.598972	0.86707	1.21314	0.698328	0.709555	0.83213	1.22102	1.16201	0.856501	1.59259	0.678386	0	0.968766	0.768234	0.662907	1.231	0.687703	1.96627	1.12457	0.505407	0.879238	0.627428	0.853221	1.02945	0.799481	1.11111	1.48547	0.956642	0.968536	0.665688	0.966606	0.677557	0.748764	0.960078	0.874731	0.940784	0.858609	0.773227	0.948496	0.983893	0.870607	0.921763	0.953729	1.19039	0.496112	0.509299
20200715_QEF1_HILIC_mouse_liver_AW112	B	1.31906	1.18271	0.937718	0.999539	0.991207	1.01146	0.440277	0.87018	0.842408	1.10751	0.873867	0.605972	0.985818	0	1.10908	1.06103	1.25074	1.03862	1.28199	0.343139	1.0802	0.749049	1.00733	0.735879	1.46009	1.00029	1.09183	0.96839	0.972062	1.29294	1.17212	1.32002	1.23495	0.95921	0.88681	1.1936	0.980769	1.23644	1.06339	0.645192	0.925635	1.26351	1.32519	0.957287	1.26078	0.91034	0.985183	1.20627
20200715_QEF1_HILIC_mouse_liver_AW113	B	1.1259	0.916804	1.39175	0.960749	0.94455	1.13283	1.30937	1.11942	1.1813	0.549708	1.14506	1.20994	1.0233	0	0.858985	1.22294	0.640238	0.964549	1.06651	0.979159	0.991923	1.04587	1.13969	1.38752	0.992221	1.07578	0.910926	0.674579	0.707053	0.427193	1.12971	0.874008	0.783551	1.12135	1.29305	1.03721	1.06853	1.08399	1.2183	0.89471	1.02547	0.814368	0.800826	1.00109	1.02976	0.938594	1.08645	1.12771
20200715_QEF1_HILIC_mouse_liver_AW114	B	0.613922	0.743526	1.07156	1.17264	0.851098	1.15738	1.5408	1.17827	0.755279	1.18077	1.12457	0.591496	1.3125	0	1.06317	0.947796	1.44611	0.765835	0.963797	0.711431	0.803306	1.69967	0.97374	1.24918	0.694469	0.894481	1.19776	1.24592	0.835419	1.32322	0.729637	1.14028	1.0149	1.24189	1.07137	0.809112	1.07597	0.73878	0.859704	1.68687	1.1004	0.938227	1.00338	1.11986	0.755736	0.960677	1.43226	1.15673
20200715_QEF1_HILIC_mouse_liver_AW115	C	0.970486	0.928591	1.10689	0.721237	1.62922	0.541313	0.442003	0.88656	1.21967	1.0801	0.792948	0.576843	1.28912	0	1.07325	0.95048	0.753307	1.35284	0.626918	0.641139	0.871499	0.893974	0.952549	0.59539	0.701046	0.893039	1.02292	0.450574	0.963752	0.63735	1.06708	0.805504	1.05063	0.51322	1.05576	1.0395	0.993366	1.14024	0.993216	0.476752	1.01	1.18687	1.04444	0.85524	1.03654	1.25997	0.523469	0.657184
20200715_QEF1_HILIC_mouse_liver_AW116	C	1.21658	0.781316	0.844677	0.890115	1.23453	0.691244	0.421703	1.01067	0.837293	1.02565	0.80957	0.487121	1.50687	0	1.13377	1.2179	1.52128	1.16355	1.17806	0.0664999	0.824983	0.995114	1.04871	0.755527	0.358193	0.664568	1.23587	1.13951	1.26799	1.23298	1.43156	1.07114	1.25849	0.902928	0.960351	1.0007	0.993816	1.0264	1.1536	0.292299	1.0556	1.26458	1.47831	0.920239	1.16077	1.02444	1.12214	1.13805
20200715_QEF1_HILIC_mouse_liver_AW117	C	0.992247	0.820507	1.08704	0.903221	0.868565	0.91942	0.388216	1.11387	1.32487	0.655607	1.01325	0.957639	1.768	0	0.912939	1.21468	0.89023	1.06833	1.1694	0.0185841	0.692557	0.957412	1.18537	1.34526	1.09607	0.985006	1.25415	0.79028	1.50717	0.646706	1.86432	0.644669	1.04145	1.18851	0.848593	1.09498	1.07217	1.18568	1.36755	0.15402	0.858595	0.920477	1.14358	1.01228	0.810042	0.936351	1.48657	1.42239
20200715_QEF1_HILIC_mouse_liver_AW118	C	0.860568	0.608874	1.03034	1.01386	0.49696	0.613672	0.50904	0.980583	0.849171	1.00892	1.05686	0.651834	2.14563	0	1.20846	0.796779	1.353	0.853061	0.966465	0.0121309	0.589009	1.63153	1.01082	1.28721	0.242922	0.532609	1.61895	1.48415	1.44471	1.53338	1.49014	0.842153	1.30029	1.60851	1.06065	1.0084	1.13966	1.08505	1.11538	0.348851	1.09915	1.05235	1.75932	1.07563	0.774323	1.03802	2.12436	1.50261
20200715_QEF1_HILIC_mouse_liver_AW119	C+Ell	0.578503	0.467355	0.000216359	0.653281	0.82713	0.577014	#VALUE!	1.04899	1.05496	1.11387	0.598375	0.658666	1.35712	0.643381	1.29563	0.938931	0.737465	0.98414	0.396447	1.17219	0.691477	1.4684	0.705423	0.59608	0.675594	0.551942	0.778933	0.312971	0.273252	0.817989	0.65677	0.226836	1.0811	0.454211	0.845135	0.8213	0.837913	0.653797	0.894698	0.900979	1.0244	1.16556	0.766787	0.788864	0.783914	1.61178	0.604675	0.443994
20200715_QEF1_HILIC_mouse_liver_AW120	C+Ell	0.972731	0.884823	0.000226987	0.925838	0.67089	0.848556	#VALUE!	1.20014	0.793818	1.12739	0.651162	0.524775	1.25539	1.03519	1.21719	1.25652	1.3045	1.0072	1.07649	1.55554	0.806062	1.01222	0.97012	0.758765	0.518253	0.64993	1.29593	0.895642	0.117924	1.33064	1.22689	0.885059	1.41928	0.890008	0.571153	0.99014	0.981647	0.984244	0.820404	1.96645	1.08538	1.10497	1.27639	0.924521	1.04315	1.07399	1.17544	1.05596
20200715_QEF1_HILIC_mouse_liver_AW121	C+Ell	2.52092	0.995831	0.000255232	0.946786	0.84092	1.03601	0.367435	0.989096	1.25304	0.488686	1.05307	1.04485	1.12119	1.36797	0.983754	1.52754	0.976087	1.39977	1.25654	1.87244	0.729696	0.618777	1.13847	1.25365	0.778147	1.35417	1.25435	0.822397	0.153159	0.876999	1.77752	0.938108	1.14726	1.10726	1.16294	1.05622	1.03114	1.17259	1.36411	0.486813	0.927104	1.05258	1.09401	0.910571	1.21972	0.833329	1.46236	1.67817
20200715_QEF1_HILIC_mouse_liver_AW122	C+Ell	0.8943	0.514145	0.00024512	0.934253	0.727758	0.729151	#VALUE!	1.05895	0.803261	0.888353	1.17372	0.527961	1.83362	0.953458	1.31328	0.998785	1.80915	0.94532	1.05221	1.8167	0.601521	1.03703	1.00951	1.42266	0.422654	0.760601	1.23932	1.49748	0.654812	1.85176	1.56128	1.01495	1.59109	1.42237	0.99084	0.969802	1.04477	0.984186	0.890183	0.892736	0.949813	1.13273	1.76201	1.02729	0.792899	1.0521	1.87853	1.34384
[truncated: 82 more columns]

## Sheet: sample key
File name	Sample	Extraction buffer	Chromatography
20200715_QEF1_HILIC_mouse_liver_AW111	liver chunk	Buffer B	ZIC-HILIC
20200715_QEF1_HILIC_mouse_liver_AW112	liver chunk	Buffer B	ZIC-HILIC
20200715_QEF1_HILIC_mouse_liver_AW113	liver chunk	Buffer B	ZIC-HILIC
20200715_QEF1_HILIC_mouse_liver_AW114	liver chunk	Buffer B	ZIC-HILIC
20200715_QEF1_HILIC_mouse_liver_AW115	liver chunk	Buffer C	ZIC-HILIC
20200715_QEF1_HILIC_mouse_liver_AW116	liver chunk	Buffer C	ZIC-HILIC
20200715_QEF1_HILIC_mouse_liver_AW117	liver chunk	Buffer C	ZIC-HILIC
20200715_QEF1_HILIC_mouse_liver_AW118	liver chunk	Buffer C	ZIC-HILIC
20200715_QEF1_HILIC_mouse_liver_AW119	liver chunk	Buffer C + Ellmans	ZIC-HILIC
20200715_QEF1_HILIC_mouse_liver_AW120	liver chunk	Buffer C + Ellmans	ZIC-HILIC
20200715_QEF1_HILIC_mouse_liver_AW121	liver chunk	Buffer C + Ellmans	ZIC-HILIC
20200715_QEF1_HILIC_mouse_liver_AW122	liver chunk	Buffer C + Ellmans	ZIC-HILIC
20200715_QEF1_HILIC_mouse_liver_AW127_pool1x	pool 111-122		ZIC-HILIC
20200715_QEF1_HILIC_mouse_liver_AW128_pool03x	pool 111-122 1/3 dilution		ZIC-HILIC
20200715_QEF1_HILIC_mouse_liver_AW129_pool01x	pool 111-122 1/10 dilution		ZIC-HILIC
